# Supplementary material for: Comparative Analysis of Major Flavonoids among Parts of Lactuca indica during Different Growth Periods
Source: MDPI journal article supplement (doi:10.3390/molecules26247445), 2021-12-08
Supplement: s1 [file s1]

**Supplementary Materials: Comparative Analysis of Major Flavonoids among Parts of  
*Lactuca indica* during Different Growth Periods**

Table S1. Dynamic accumulation of six compounds in roots of *Lactuca indica* L. cv.Mengzao (μg/g)

| Harvest time            | Luteolin | Rutin                     | Quercetin | Luteolin-7-O-glucoside  | Apigenin                | Kaempferol |
|-------------------------|----------|---------------------------|-----------|-------------------------|-------------------------|------------|
| Vegetative stage        | -        | 172.094±4.02 <sup>a</sup> | -         | 4.987±0.12 <sup>a</sup> | 1.725±0.13 <sup>a</sup> | 0.936±0.04 |
| Budding stage           | -        | 8.607±0.11 <sup>c</sup>   | -         | 0.646±0.05 <sup>e</sup> | -                       | -          |
| Initial flowering stage | -        | 2.583±0.22 <sup>d</sup>   | -         | 0.458±0.03 <sup>f</sup> | 0.901±0.05 <sup>b</sup> | -          |
| Middle flowering stage  | -        | 23.215±1.34 <sup>b</sup>  | -         | 2.315±0.15 <sup>c</sup> | 0.678±0.03 <sup>b</sup> | -          |
| Peak flowering stage    | -        | 7.801±1.61 <sup>c</sup>   | -         | 2.798±0.24 <sup>b</sup> | 0.894±0.07 <sup>b</sup> | -          |
| Filling stage           | -        | 1.742±0.14 <sup>d</sup>   | -         | 0.879±0.08 <sup>d</sup> | -                       | -          |

The “-” indicates not detected. Different lowercase letters in the same column indicate the significance of the difference between treatments at the level of 0.05, the same as in the following table

Table S2. Dynamic accumulation of six compounds in stems of *Lactuca indica* L. cv.Mengzao (μg/g)

| Harvest time            | Luteolin                 | Rutin                      | Quercetin                | Luteolin-7-O-glucoside   | Apigenin                | Kaempferol              |
|-------------------------|--------------------------|----------------------------|--------------------------|--------------------------|-------------------------|-------------------------|
| Vegetative stage        | 5.154±0.31 <sup>e</sup>  | 50.161±2.15 <sup>e</sup>   | 8.446±0.12 <sup>c</sup>  | 10.464±1.52 <sup>d</sup> | 2.451±0.02 <sup>f</sup> | 0.545±0.08 <sup>e</sup> |
| Budding stage           | 4.249±0.36 <sup>e</sup>  | 23.097±2.45 <sup>f</sup>   | 11.431±0.44 <sup>a</sup> | 1.202±0.04 <sup>f</sup>  | 3.655±0.15 <sup>e</sup> | 1.341±0.09 <sup>d</sup> |
| Initial flowering stage | 8.721±1.55 <sup>d</sup>  | 646.860±14.75 <sup>a</sup> | 11.317±0.10 <sup>a</sup> | 42.227±0.94 <sup>a</sup> | 4.534±0.08 <sup>d</sup> | 2.478±0.10 <sup>c</sup> |
| Middle flowering stage  | 12.066±0.08 <sup>c</sup> | 81.894±7.36 <sup>d</sup>   | 11.391±0.02 <sup>a</sup> | 5.091±0.35 <sup>e</sup>  | 5.391±0.26 <sup>c</sup> | 2.605±0.23 <sup>c</sup> |
| Peak flowering stage    | 16.560±0.30 <sup>b</sup> | 346.080±12.46 <sup>b</sup> | 11.011±0.41 <sup>b</sup> | 32.738±1.12 <sup>c</sup> | 9.255±0.22 <sup>a</sup> | 3.611±0.10 <sup>b</sup> |
| Filling stage           | 20.794±2.58 <sup>a</sup> | 233.559±8.76 <sup>c</sup>  | 11.091±0.65 <sup>b</sup> | 34.208±2.02 <sup>b</sup> | 5.814±0.58 <sup>b</sup> | 4.704±0.58 <sup>a</sup> |

Table S3. Dynamic accumulation of six compounds in flowers of *Lactuca indica* L. cv.Mengzao (μg/g)

| Harvest period          | Luteolin                  | Rutin                       | Quercetin                | Luteolin-7-O-glucoside    | Apigenin                   | Kaempferol               |
|-------------------------|---------------------------|-----------------------------|--------------------------|---------------------------|----------------------------|--------------------------|
| Initial flowering stage | 445.518±9.42 <sup>a</sup> | 1487.904±1.85 <sup>a</sup>  | 18.951±0.86 <sup>a</sup> | 170.516±9.56 <sup>c</sup> | 142.117±4.49 <sup>a</sup>  | 58.970±0.22 <sup>a</sup> |
| Middle flowering stage  | 310.766±4.68 <sup>b</sup> | 1376.498±10.38 <sup>b</sup> | 17.494±3.46 <sup>b</sup> | 211.15±6.71 <sup>b</sup>  | 134.614±15.73 <sup>b</sup> | 35.598±3.70 <sup>b</sup> |
| Peak flowering stage    | 186.457±1.83 <sup>c</sup> | 1246.715±2.36 <sup>c</sup>  | 14.143±0.15 <sup>c</sup> | 272.810±3.76 <sup>a</sup> | 131.769±1.21 <sup>b</sup>  | 27.886±0.19 <sup>c</sup> |
